# Supplementary material for: A new α-Keggin type polyoxometalate coordinated to four silver complex moieties: {PW9V3O40[Ag(2,2′-bipy)]2[Ag2(2,2′-bipy)3]2}Electronic supplementary information (ESI) available: thermal ellipsoid plot of [Ag2(2,2′-bipy)3]2+, schematic representation of the molecular building blocks of 1, simplified 2-D representation of the supramolecular network of 1, IR spectra, XPS spectra and a TG curve for 1. See http://www.rsc.org/suppdata/dt/b2/b208531c/
Source: Royal Society of Chemistry journal article supplement (doi:10.1039/b208531c), 2002-12-17
Supplement: b208531c.pdf [file b208531c.pdf]

## Supplementary Materials

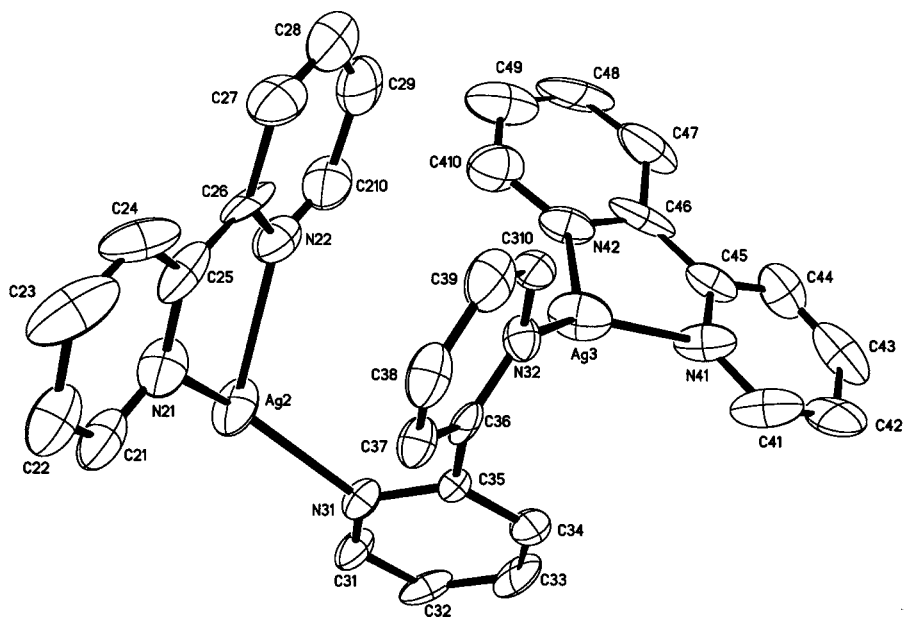

**Fig. S1** Thermal ellipsoid plot of  $[\text{Ag}_2(2, 2'\text{-bipy})_3]^{2+}$  groups showing the coordination environment around Ag(2) and Ag(3) and their connectivity.

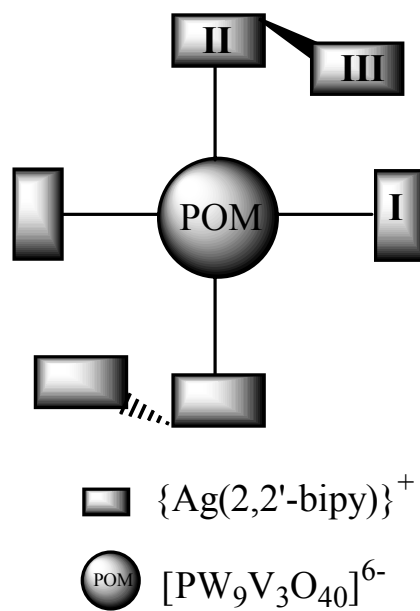

**Scheme S1** The schematic representation of molecular building block of **1**. Group I, II and III are representative of the  $\{\text{Ag}(1)(2,2'\text{-bipy})\}^+$   $\{\text{Ag}(2)(2,2'\text{-bipy})\}^+$  and  $\{\text{Ag}(3)(2,2'\text{-bipy})\}^+$  units, respectively.

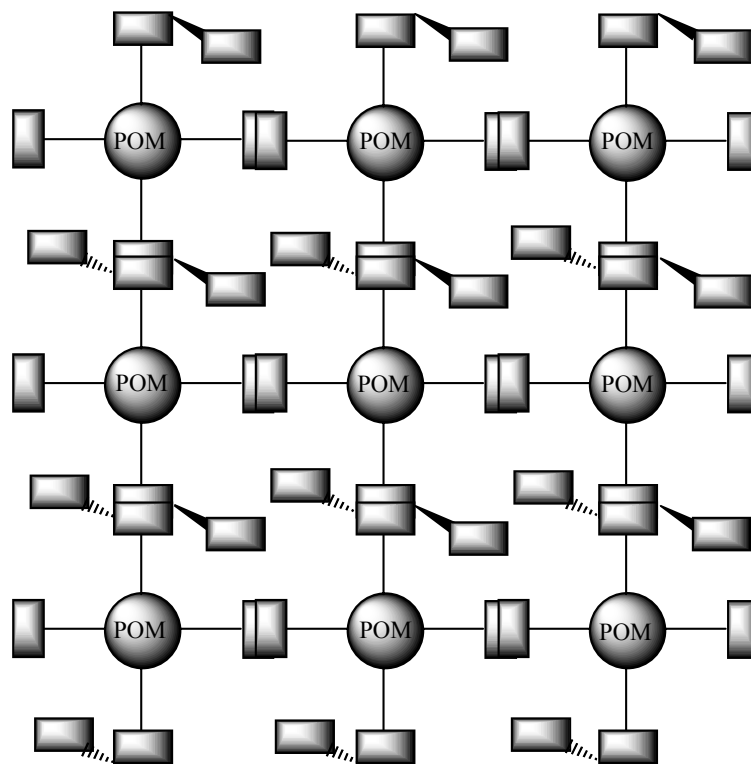

**Scheme S2** Simplified schematic representation of the 2D supramolecular network of

**1.**

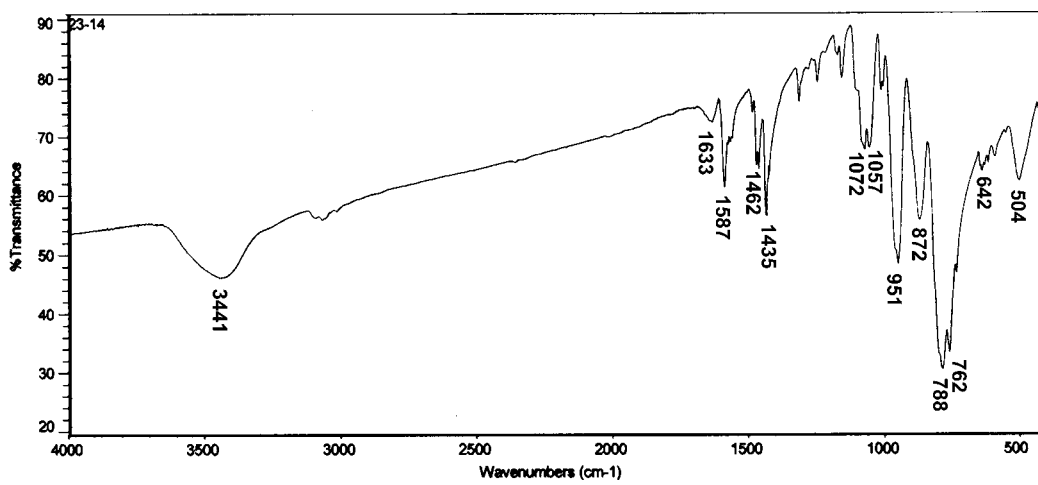

Fig. S2 The IR spectrum of compound 1

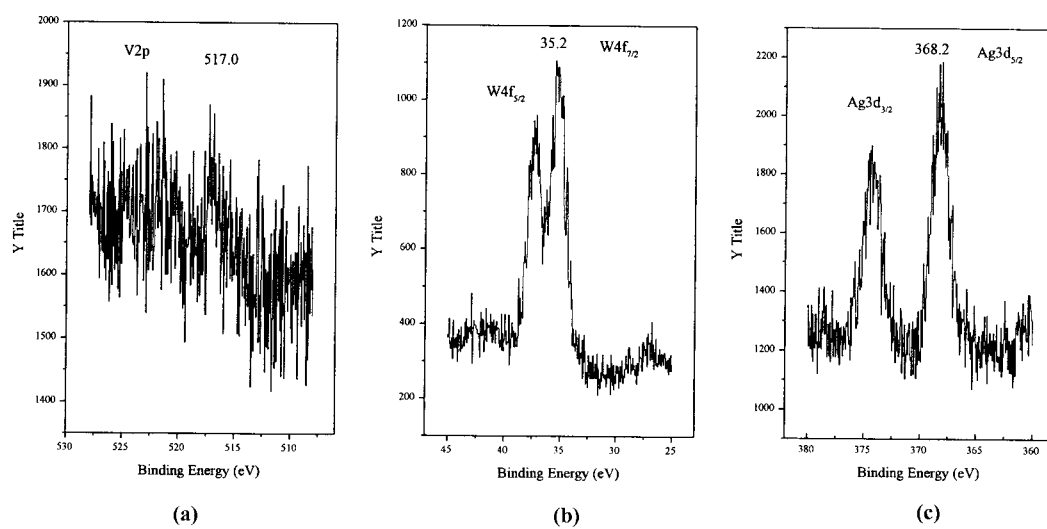

**Fig. S3** The XPS spectra of compound **1**

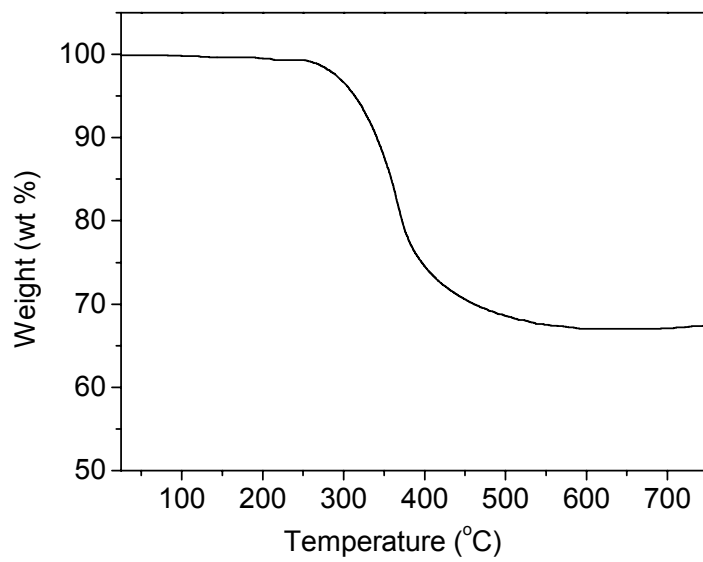

**Fig. S4** The TG curve of compound **1**
